# Supplementary figures and images for: Template-assisted vapour–liquid–solid growth of InP nanowires on (001) InP and Si substrates
Source: Royal Society of Chemistry journal article supplement (doi:10.1039/c9nr08025b), 2019-12-10

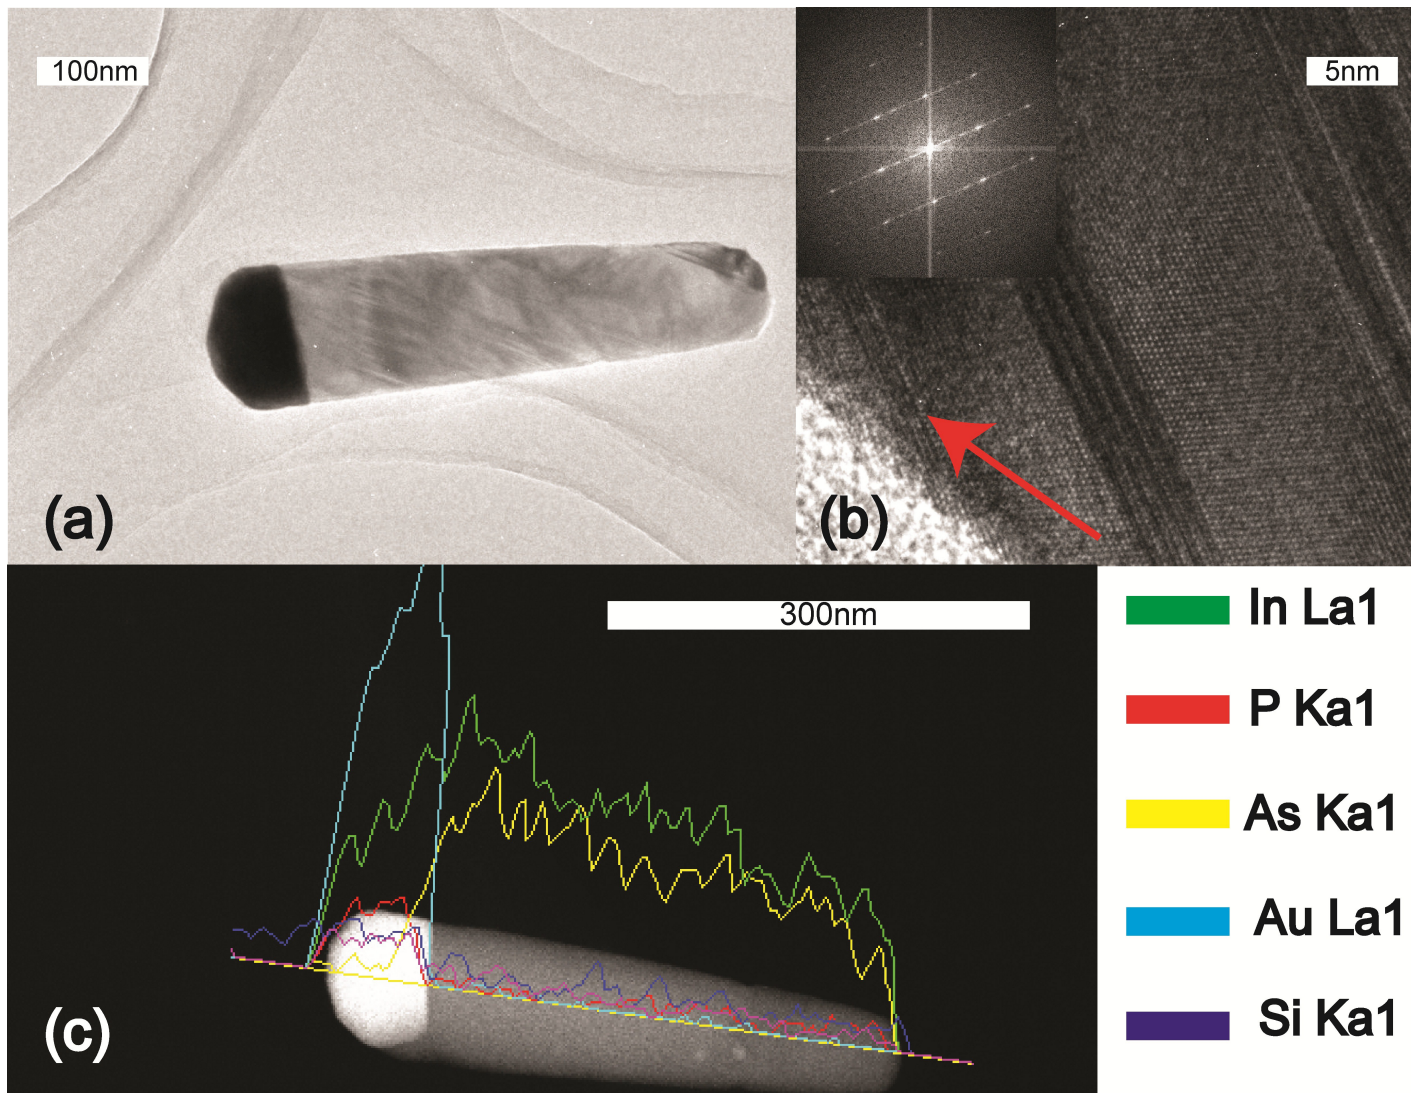

Supplement: c9nr08025b3.pdf [file c9nr08025b3.pdf]
